# Supplementary material for: Divorcing the Late Upper Palaeolithic demographic histories of mtDNA haplogroups M1 and U6 in Africa
Source: PubMed Central journal article supplement (PMC3582464; doi:10.1186/1471-2148-12-234), 2012-12-03

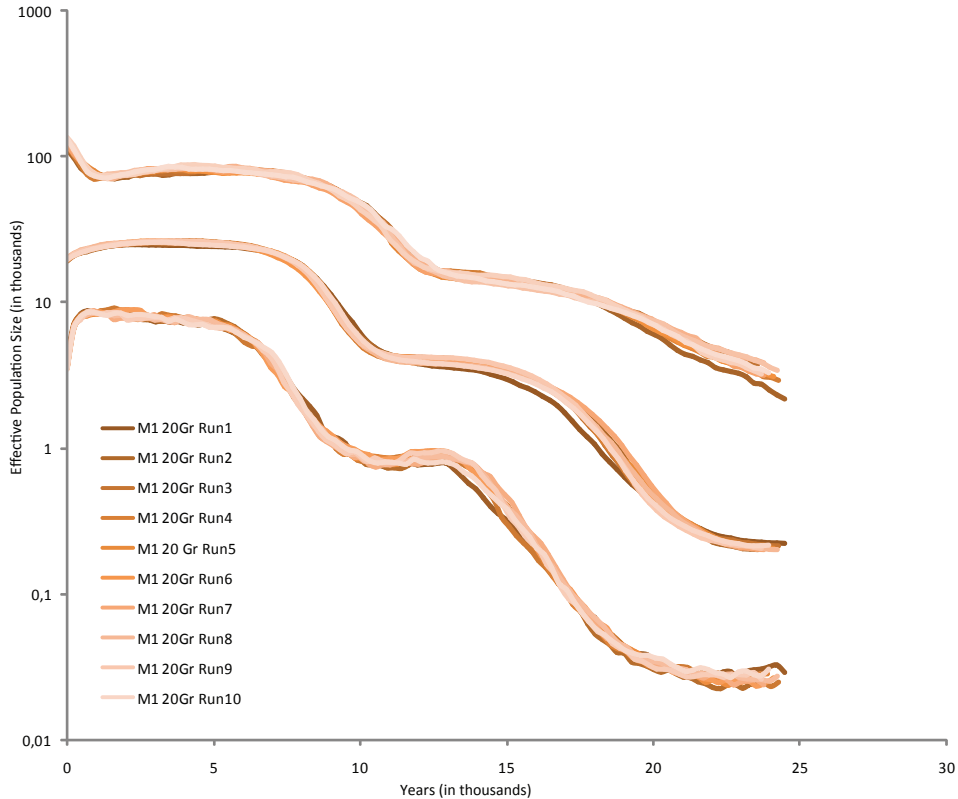

Supplement: 1471-2148-12-234-S10.pdf [file 1471-2148-12-234-S10.pdf]
